# Supplementary material
Source: PubMed Central journal article supplement (PMC4568215)
Supplement: pnas.1512704112.sapp.pdf [file pnas.1512704112.sapp.pdf]

## Supporting Information

| <b>Contents</b>                                                                                                       | <b>Page</b> |
|-----------------------------------------------------------------------------------------------------------------------|-------------|
| Methods                                                                                                               | S2          |
| Table S1. Linear Tyr/Trp Chain Search Results, 5-Å ET cutoff distance, $\geq 1$ solvent-exposed residue               | S2          |
| Table S2. Branched Tyr/Trp Chain Search Results, 5-Å ET cutoff distance, $\geq 1$ solvent-exposed residue.            | S3          |
| Table S3. Linear Tyr/Trp Chain Search Results, EC 1 Family, 5-Å ET cutoff distance, $\geq 1$ solvent-exposed residue. | S4          |
| Table S4. Sequence alignment of CYP11A1 proteins (from UniProt/Swiss-Prot database).                                  | S6          |
| Table S5. Linear Tyr/Trp Search Results, EC 3 Family, 5-Å ET cutoff distance, $\geq 1$ solvent-exposed residue.       | S8          |
| Figure S1                                                                                                             | S9          |
| Figure S2                                                                                                             | S10         |
| Figure S3                                                                                                             | S11         |
| Figure S4                                                                                                             | S11         |
| Figure S5                                                                                                             | S12         |
| Figure S6                                                                                                             | S12         |
| Figure S7                                                                                                             | S13         |
| Figure S8                                                                                                             | S13         |

## Methods

### Kinetics Simulations.

#### Tyr/Trp Chains used in Kinetics Simulations

##### **CYP11A1 (PDB ID 3N9Y)**

Tyr/Trp chain residues: TYR90; TYR93; TYR94; TRP87; TRP231

##### **KDM4A (PDB ID 4V2W)**

Tyr/Trp chain residues: TYR121; TYR209; TYR273; TYR275; TYR299; TRP122; TRP181; TRP187

##### ***Methane Monooxygenase Methylococcus capsulatus (Bath) (PDB ID 1MTY)***

Linear Tyr/Trp chain residues: TYR251; TYR324; TRP313; TRP317

Branched Tyr/Trp chain residues: TYR292; TYR310; TYR340; TYR347; TYR351; TYR376; TYR380; TYR383; TYR-D387; TRP301; TRP305; TRP308; TRP341; TRP354; TRP371; TRP379; TRP390; TRP407; TRP507

**Table S1. Linear Tyr/Trp Chain Search Results, 5-Å ET cutoff distance, ≥1 solvent-exposed residue**

| Maximum Chain Length (residues) |                  | 0                                                               | 1    | 2      | 3    | 4    | 5   | 6   | 7  | 8  | 9  | 10 | 11 | 12 |
|---------------------------------|------------------|-----------------------------------------------------------------|------|--------|------|------|-----|-----|----|----|----|----|----|----|
| Data Set                        | Total Structures | Number of Structures with the Specified Chain Length (residues) |      |        |      |      |     |     |    |    |    |    |    |    |
| Full DB                         | 27,355           | 435                                                             | 7741 | 10,600 | 5382 | 2100 | 686 | 257 | 90 | 43 | 13 | 7  | 0  | 1  |
| EC 1                            | 2200             | 6                                                               | 516  | 863    | 505  | 198  | 57  | 32  | 11 | 6  | 0  | 6  | 0  | 0  |
| EC 2                            | 3590             | 22                                                              | 969  | 1474   | 688  | 291  | 104 | 25  | 13 | 4  | 0  | 0  | 0  | 0  |
| EC 3                            | 3999             | 18                                                              | 748  | 1495   | 976  | 440  | 183 | 80  | 36 | 15 | 8  | 0  | 0  | 0  |
| EC 4                            | 1024             | 6                                                               | 306  | 401    | 215  | 70   | 18  | 5   | 2  | 1  | 0  | 0  | 0  | 0  |
| EC 5                            | 703              | 7                                                               | 221  | 286    | 130  | 43   | 11  | 4   | 0  | 1  | 0  | 0  | 0  | 0  |
| EC 6                            | 703              | 6                                                               | 160  | 304    | 166  | 49   | 13  | 3   | 2  | 0  | 0  | 0  | 0  | 0  |

**Table S2. Branched Tyr/Trp Chain Search Results, 5-Å ET cutoff distance, ≥1 solvent-exposed residue**

| Maximum Chain Length (residues) |                  | 0                                                    | 1    | 2    | 3    | 4    | 5    | 6   | 7   | 8   | 9  | 10 | 11 | 12 |
|---------------------------------|------------------|------------------------------------------------------|------|------|------|------|------|-----|-----|-----|----|----|----|----|
| Data Set                        | Total Structures | Number of Structures with the Specified Chain Length |      |      |      |      |      |     |     |     |    |    |    |    |
| Full DB                         | 27,355           | 435                                                  | 7741 | 9869 | 4987 | 2334 | 1018 | 473 | 208 | 129 | 68 | 34 | 23 | 13 |
| EC 1                            | 2200             | 6                                                    | 516  | 791  | 452  | 232  | 100  | 42  | 19  | 16  | 12 | 3  | 2  | 3  |
| EC 2                            | 3590             | 22                                                   | 969  | 1381 | 630  | 304  | 155  | 74  | 26  | 14  | 10 | 3  | 2  | 0  |
| EC 3                            | 3999             | 18                                                   | 748  | 1364 | 872  | 466  | 242  | 117 | 58  | 47  | 29 | 15 | 15 | 4  |
| EC 4                            | 1024             | 6                                                    | 306  | 377  | 196  | 78   | 38   | 13  | 6   | 1   | 1  | 1  | 1  | 0  |
| EC 5                            | 703              | 7                                                    | 221  | 266  | 124  | 53   | 19   | 8   | 4   | 0   | 0  | 0  | 1  | 0  |
| EC 6                            | 703              | 6                                                    | 160  | 293  | 151  | 58   | 22   | 8   | 3   | 0   | 1  | 0  | 0  | 0  |

**Table S2. Branched Tyr/Trp Chain Search Results, 5-Å ET cutoff distance, ≥1 solvent-exposed residue (continued)**

| Maximum Chain Length (residues) | 13                                                   | 14 | 15 | 16 | 17 | 18 | 19 | 20 | 21 | 22 | 23 |
|---------------------------------|------------------------------------------------------|----|----|----|----|----|----|----|----|----|----|
| Data Set                        | Number of Structures with the Specified Chain Length |    |    |    |    |    |    |    |    |    |    |
| Full DB                         | 6                                                    | 4  | 3  | 1  | 1  | 3  | 3  | 1  | 0  | 0  | 1  |
| EC 1                            | 1                                                    | 0  | 0  | 0  | 0  | 2  | 2  | 1  | 0  | 0  | 0  |
| EC 2                            | 0                                                    | 0  | 0  | 0  | 0  | 0  | 0  | 0  | 0  | 0  | 0  |
| EC 3                            | 2                                                    | 1  | 1  | 0  | 0  | 0  | 0  | 0  | 0  | 0  | 0  |
| EC 4                            | 0                                                    | 0  | 0  | 0  | 0  | 0  | 0  | 0  | 0  | 0  | 0  |
| EC 5                            | 0                                                    | 0  | 0  | 0  | 0  | 0  | 0  | 0  | 0  | 0  | 0  |
| EC 6                            | 1                                                    | 0  | 0  | 0  | 0  | 0  | 0  | 0  | 0  | 0  | 0  |

**Table S3. Linear Tyr/Trp Chain Search Results, EC 1 Family, 5-Å ET cutoff distance, ≥1 solvent-exposed residue**

| Maximum Chain Length (residues) |                  | 0                                                    | 1   | 2   | 3   | 4   | 5  | 6  | 7  | 8 | 9 | 10 |
|---------------------------------|------------------|------------------------------------------------------|-----|-----|-----|-----|----|----|----|---|---|----|
| Data Set                        | Total Structures | Number of Structures with the Specified Chain Length |     |     |     |     |    |    |    |   |   |    |
| EC 1                            | 2200             | 6                                                    | 516 | 863 | 505 | 198 | 57 | 32 | 11 | 6 | 0 | 6  |
| EC 1.1                          | 576              | 0                                                    | 167 | 239 | 120 | 34  | 10 | 6  | 0  | 0 | 0 | 0  |
| EC 1.2                          | 175              | 0                                                    | 44  | 70  | 46  | 12  | 2  | 1  | 0  | 0 | 0 | 0  |
| EC 1.3                          | 160              | 0                                                    | 34  | 71  | 30  | 16  | 4  | 3  | 2  | 0 | 0 | 0  |
| EC 1.4                          | 83               | 0                                                    | 7   | 30  | 28  | 11  | 4  | 2  | 1  | 0 | 0 | 0  |
| EC 1.5                          | 107              | 0                                                    | 24  | 35  | 38  | 8   | 2  | 0  | 0  | 0 | 0 | 0  |
| EC 1.6                          | 69               | 1                                                    | 15  | 29  | 17  | 6   | 1  | 0  | 0  | 0 | 0 | 0  |
| EC 1.7                          | 69               | 0                                                    | 13  | 22  | 18  | 8   | 1  | 2  | 1  | 1 | 0 | 3  |
| EC 1.8                          | 150              | 1                                                    | 39  | 56  | 39  | 11  | 3  | 1  | 0  | 0 | 0 | 0  |
| EC 1.8                          | 13               | 0                                                    | 0   | 2   | 4   | 2   | 0  | 5  | 0  | 0 | 0 | 0  |
| EC 1.10                         | 59               | 0                                                    | 11  | 19  | 7   | 14  | 4  | 0  | 4  | 0 | 0 | 0  |
| EC 1.11                         | 150              | 0                                                    | 62  | 51  | 27  | 8   | 1  | 0  | 0  | 1 | 0 | 0  |
| EC 1.12                         | 19               | 0                                                    | 1   | 8   | 4   | 3   | 3  | 0  | 0  | 0 | 0 | 0  |
| EC 1.13                         | 98               | 0                                                    | 11  | 38  | 30  | 12  | 7  | 0  | 0  | 0 | 0 | 0  |
| EC 1.14                         | 254              | 0                                                    | 30  | 101 | 77  | 30  | 7  | 3  | 1  | 2 | 0 | 3  |
| EC 1.15                         | 84               | 4                                                    | 22  | 18  | 3   | 15  | 8  | 9  | 4  | 1 | 0 | 0  |
| EC 1.16                         | 35               | 0                                                    | 11  | 15  | 5   | 2   | 0  | 2  | 0  | 0 | 0 | 0  |
| EC 1.17                         | 52               | 0                                                    | 8   | 21  | 12  | 10  | 1  | 0  | 0  | 0 | 0 | 0  |
| EC 1.18                         | 35               | 0                                                    | 8   | 17  | 9   | 1   | 0  | 0  | 0  | 0 | 0 | 0  |
| EC 1.20, 21,22,97               | 22               | 0                                                    | 7   | 7   | 5   | 1   | 1  | 0  | 0  | 1 | 0 | 0  |

Definitions:

- EC 1 Oxidoreductases
- EC 1.1 Acting on the CH-OH group of donors
- EC 1.2 Acting on the aldehyde or oxo group of donors
- EC 1.3 Acting on the CH-CH group of donors
- EC 1.4 Acting on the CH-NH<sub>2</sub> group of donors
- EC 1.5 Acting on the CH-NH group of donors
- EC 1.6 Acting on NADH or NADPH
- EC 1.7 Acting on other nitrogenous compounds as donors
- EC 1.8 Acting on a sulfur group of donors
- EC 1.9 Acting on a heme group of donors
- EC 1.10 Acting on diphenols and related substances as donors
- EC 1.11 Acting on a peroxide as acceptor
- EC 1.12 Acting on hydrogen as donor
- EC 1.13 Acting on single donors with incorporation of molecular oxygen
- EC 1.14 Acting on paired donors, with incorporation or reduction of molecular oxygen

EC 1.15 Acting on superoxide as acceptor  
EC 1.16 Oxidizing metal ions  
EC 1.17 Acting on CH or CH<sub>2</sub> groups  
EC 1.18 Acting on iron-sulfur proteins as donors  
EC 1.19 Acting on reduced flavodoxin as donor  
EC 1.20 Acting on phosphorus or arsenic in donors  
EC 1.21 Catalyzing the reaction  $X-H + Y-H = X-Y$   
EC 1.22 Acting on halogen in donors  
EC 1.23 Reducing C-O-C group as acceptor  
EC 1.97 Other oxidoreductases

**Table S4.** Sequence alignment of CYP11A1 proteins (from UniProt/Swiss-Prot database). Positions of human residues Trp87 (yellow), Tyr90 (green), Tyr93 (cyan), Tyr94 (magenta), and Trp231 (red) are highlighted in color.

|             |                                                                |     |
|-------------|----------------------------------------------------------------|-----|
| CP11A_HUMAN | -----MLAKGLPPRSVL-VKGCQTFLSAPREGLGRLRVPTGEGAGIS-TRSPRPFPNEIPS  | 53  |
| CP11A_RAT   | -----MLAKGLCLRSVL-VKSCQPFLSPVWQ--GPGLATGNGAGISSTNSPRSPNEIPS    | 51  |
| CP11A_MESAU | -----MLAKGLSLRSVL-AGKGCQPFLSPTWQ---SSVLATGGGANIS-TNSPRFPNEIPS  | 50  |
| CP11A_MOUSE | -----MLAKGLSLRSVL-VKGCQPFLSPTWQ---GPVLSTGKGAGTS-TSSPRSPNEIPS   | 50  |
| CP11A_MACFA | -----MLAKGLPPRSVL-VKGCQTFLSAPKERLGLHLRVPTSEGAGIS-TRSPRPFPNEIPS | 53  |
| CP11A_BOVIN | -----MLARGLPLRSAL-VKACPPILSTVGEWGHHRVGTGEGAGIS-TKTPRPYSEIPS    | 53  |
| CP11A_SHEEP | -----MLARGLPFRSAL-VKACPLLNTGREWGHHRVGTGEGAGIS-TRTPRPYSEIPS     | 53  |
| CP11A_PIG   | -----MLARGLPLRSVL-VKGCQPFLSAPRECPGHPRVGTGEGACIS-TKTPRPFSEIPS   | 53  |
| CP11A_HORSE | -----MLVRGLPLRSVL-VKGCQPFLSAPREGPGHPRVPTGEGAGMS-SHSPRPFKSEIPS  | 53  |
| CP11A_CAPHI | -----MLARGLPLRSAL-VKACPLLNTGREWGHHRVGTGEGAGIS-TRTPRPYSEIPS     | 53  |
| CP11A_RABIT | -----RGLPSRSVF-LRGCQASLSTAQERLGHVPTREGVVA-TRSPRPYHEIPS         | 50  |
| CP11A_DASAM | SFRLSLSASTYAQRGSFTTPEHDFTLFPHRN---H--SVTSESRIPESEQLKSLTDIPG    | 54  |
| CP11A_ONCMY | -----MMVSVSVCRSSALPACGLPSARHNS---SMPVVRQALSPDNSSSTVQNFSEIPG    | 51  |
| CP11A_HUMAN | PGDNGWLNLYHFWRGTGTHKVLHHVQNFQYKGPYREKLGNVESVYVIDPEDVALLFKS     | 113 |
| CP11A_RAT   | PGDNGWINLYHFLRENGTHR IYHHMQNFQYKGPYREKLGNMESVYILDPKDAATLFSC    | 111 |
| CP11A_MESAU | PGDNGWLNLYHFWRENGTHR IYHHMQNFQYKGPYREKLGKNDKSVYILDPEAAQLFSL    | 110 |
| CP11A_MOUSE | PGDNGWLNLYHFWRSGTQKIHYHQMSFQYKGPYREKLGTLSEVYIVDPKDAIILFSC      | 110 |
| CP11A_MACFA | PGDNGWLNLYHFWRGTGTHKVLHHVQNFQYKDPYREKLGNVESVYVIDPEDVALLFKS     | 113 |
| CP11A_BOVIN | PGDNGWLNLYHFWRKKSQR IHFHRIENFQYKGPYREKLGKNDKSVYIHPEDVAHLFKF    | 113 |
| CP11A_SHEEP | PGDNGWINLYHFWRKKSQR IHFHRIENFQYKGPYREKLGKNDKSVYIHPEDVAHLFKF    | 113 |
| CP11A_PIG   | PGDNGWINLYHFWRKKSQR IHFHRIENFQYKGPYREKLGKNDKSVYIHPEDVAHLFKF    | 113 |
| CP11A_HORSE | PGDNGWINLYHFWRKKSQR IHFHRIENFQYKGPYREKLGKNDKSVYIHPEDVAHLFKF    | 113 |
| CP11A_CAPHI | PGDNGWINLYHFWRKKSQR IHFHRIENFQYKGPYREKLGKNDKSVYIHPEDVAHLFKF    | 113 |
| CP11A_RABIT | PGDNGWLNLYHLAEKGTGTHVYRHVQNFQYKGPYREKLGKNDKSVYIHPEDVALLFNS     | 110 |
| CP11A_DASAM | NWRKNWLVVYFWRSNGLNNAHQWMLDNFNKYGPIYREKIAYYESINIINPADAVIMNKS    | 114 |
| CP11A_ONCMY | LWRNGLANLYSFWKLDGFRNIHRVMVHNFNTFGPIYREKIGYYSVNI IKPEMPAILFKA   | 111 |
| CP11A_HUMAN | EGPNPERFLIPPWVAHQYQRPVGVLLKKSAAWKDRVALNQEVMAPETKFNFLPLLDA      | 173 |
| CP11A_RAT   | EGPNPERYLPPWVAHQYQRPVGVLLKKSAAWKDRVILNQEVMAPDSIKNFVPLLEG       | 171 |
| CP11A_MESAU | EGPYPERYLPPWVAHQYQRPVGVLLKKSAAWKDRVILNQEVMAPETKFNFLPLLEG       | 170 |
| CP11A_MOUSE | EGPNPERFLIPPWVAHQYQRPVGVLLKKSAAWKDRVILNQEVMAPGAIKNFVPLLEG      | 170 |
| CP11A_MACFA | EGPNPERFLIPPWVAHQYQRPVGVLLKKSAAWKDRVALNQEVMAPETKFNFLPLLDA      | 173 |
| CP11A_BOVIN | EGSYPERYDIPPLVAHQYQRPVGVLLKKSAAWKDRVILNQEVMAPETKFNFLPLLNP      | 173 |
| CP11A_SHEEP | EGSYQORYDIPPLVAHQYQRPVGVLLKKSAAWKDRVILNQEVMAPETKFNFLPLLNP      | 173 |
| CP11A_PIG   | EGPNPERYNIPPWVAHQYQRPVGVLLKKSAAWKDRVILNQEVMAPETKFNFLPLLD       | 173 |
| CP11A_HORSE | EGPHPERFLIPPWVAHQYQRPVGVLLKKSAAWKDRVILNQEVMAPETKFNFLPLLD       | 173 |
| CP11A_CAPHI | EGSYQORYDIPPLVAHQYQRPVGVLLKKSAAWKDRVILNQEVMAPETKFNFLPLLNP      | 173 |
| CP11A_RABIT | EGPQPERFLIPPWVAHQYQRPVGVLLKKSAAWKDRVILNQEVMAPDAIKNFVPLLEA      | 170 |
| CP11A_DASAM | EGPFPKRIEMAPWVAHQYQRPVGVLLKKSAAWKDRVILNQEVMAPDAIKNFVPLFNE      | 174 |
| CP11A_ONCMY | EGHYPKRLTVEAWTSRDYRNRKYGVLLKNGEDWRSNRVILNREVISPKVLGNFVPLLDE    | 171 |
| CP11A_HUMAN | VSRDFVSVLHRRIKKAGSGNYSGDISDDLFRFAPESITNVI FGERQGMLEEVVNPEAQR   | 233 |
| CP11A_RAT   | VAQDFIKVLHRRIKQKNSGKFSGDISDDLFRFAPESITSVVFGERLGMLEEIVDPESQRF   | 231 |
| CP11A_MESAU | VQQDFINVLHRRIKQKNSGKFSGDISDDLFRFAPESITSVVFGERLGMLEEIVDPESQRF   | 230 |
| CP11A_MOUSE | VAQDFIKVLHRRIKQKNSGKFSGDISDDLFRFAPESISSVI FGERMGMLEEIVDPEAQR   | 230 |
| CP11A_MACFA | VSRDFVSVLHRRIKKAGSGNYSGDISDDLFRFAPESITNVI FGERQGMLEEVVNPEGQRF  | 233 |
| CP11A_BOVIN | VSQDFVSVLLHRRIKQKNSGKFSGDIKEDLFRFAPESITNVMFGERLGMLEETVNPEAQKF  | 233 |
| CP11A_SHEEP | VSQDFVSVLLHRRIKQKNSGKFSGDIKEDLFRFAPESITNVMFGERLGMLEETVDTTEAQKF | 233 |
| CP11A_PIG   | VSQDFVSVLHRRIKQKNSGKFSGDIREDLFRFAPESITNVI FGERLGMLEEIVDPEAQKF  | 233 |
| CP11A_HORSE | VSQDFVSVLLHRRMEQKNSGKFSGPIIEDLFRFAPESITNVI FGERQGMLEIVDPEAQRF  | 233 |
| CP11A_CAPHI | VSQDFVSVLLHRRIKQKNSGKFSGDIKEDLFRFAPESITNVMFGERLGMLEETVNTEAQKF  | 233 |
| CP11A_RABIT | VSQAFVSMVHGRVQ---QGVFSGDISDDLFRFAPESMTNIMFGERLGMLEETVDPPEAHEF  | 227 |
| CP11A_DASAM | VVLDFVSMVHKEVEKRSRSDYKTDLTNDLFLKALEVICYILYGERLDLLQRKYNKAPQKF   | 234 |
| CP11A_ONCMY | VQDFVARVHKKIERSGQDKWTTDLSQELFKYALESVGSVLYGERLGLMLDYINPEAQHF    | 231 |
| CP11A_HUMAN | IDAIYQMFHTSVPMNLNPPDLFRLFRKTWTDHVAADVI FSKADIYQNFYWELRQKGS     | 293 |
| CP11A_RAT   | IDAVYQMFHTSVPMNLNPPDLFRLFRKTWTDHAAAADVI FSKADEYTQNFYWDLRQKRD   | 291 |
| CP11A_MESAU | IDAIYQMFHTSVPMNLNPPDLFRLFRKTWTDHAAAADMI FKKADYDTQTFYWDLRQKQE   | 290 |
| CP11A_MOUSE | INAVYQMFHTSVPMNLNPPDFRLLRKTWTDHAAAADVI FNKADEYTQNFYWDLRQKRD    | 290 |
| CP11A_MACFA | IDAIYQMFHTSVHMLNLPDLFRLFRKTWTDHVAADVI FSKADMYTENFHWELRQKGN     | 293 |
| CP11A_BOVIN | IDAVYKMFHTSVPLNLPPELYRFLFRKTWRDHVAADTI FNKAKEYTEIFYQDLRRKTE    | 293 |
| CP11A_SHEEP | IDAVYKMFHTSVPLNLPPELYRFLFRKTWRDHVAADTI FNKAKEYTEIFYQDLRQKTE    | 293 |
| CP11A_PIG   | IDAVYQMFHTSVPMNLNPPDLFRLFRKTWRDHVAADTI FNKAKEYTQNFYWDLRRKRE    | 293 |
| CP11A_HORSE | IDAVYKMFHTSVPMNLPDLFRLFRKTWRDHVAADTVFSKAEQYTEKFYQDLRQKRD       | 293 |
| CP11A_CAPHI | IDAVYKMFHTSVPLNLPPELYRFLFRKTWRDHVAADTI FNKAKEYTEIFYQDLRQKTE    | 293 |
| CP11A_RABIT | IDAVYQMFHTSVPMNLPDLFRLFRKTWRDHVAADVI FTNADKYTQSFYWDLRQKQD      | 287 |
| CP11A_DASAM | IDSIAATMFHSTPIMLYVPPSLKINSKIQQHVGSDNI FEHADTYLKKAYRQFQGSK      | 294 |
| CP11A_ONCMY | IDCISLMFKTTPMPLYIPPAMLRRVGAKIWRDHVAADGIFNQADRCIQNIYRTMRQDTN    | 291 |

|             |                                                               |       |
|-------------|---------------------------------------------------------------|-------|
| CP11A_HUMAN | VHHDYRGILYRLLGDSKMSFEDIKANVTEMLAGGVDTTSMTLQWHLYEMARNLKVQDMLR  | 353   |
| CP11A_RAT   | -FSKYPGVLYSLLGKNKLPFKNIQANITEMLAGGVDTTSMTLQWNLYEMAHNLKVQEMLR  | 350   |
| CP11A_MESAU | -FSKYPGVLYSLLGKNKLPFKNIQANITEMLAGGVDTTSMTLQWLSYEMAHNLKVQEMLR  | 349   |
| CP11A_MOUSE | -FSQYPGVLYSLLGKNKLPFKNIQANITEMLAGGVDTTSMTLQWNLYEMAHNLKVQEMLR  | 349   |
| CP11A_MACFA | VHHDYRGILYRLLGDSKMSFEDIKANVTEMLAGGVDTTSMTLQWHLYEMARNLKVQDMLR  | 353   |
| CP11A_BOVIN | -FRNYPGILYCLLKSEKMLLEDVKANITEMLAGGVNTTSMTLQWHLYEMARSLNVQEMLR  | 352   |
| CP11A_SHEEP | -FRNYPGILYHLLKSEKMLLEDVKANITEMLAGGVDTTSMTLQWHLYEMARSLNVQEMLR  | 352   |
| CP11A_PIG   | -FNNYPGILYRLLGNDKLLSEVDKANVTEMLAGGVDTTSMTLQWHLYEMARSLNVQEMLR  | 352   |
| CP11A_HORSE | -FDSYPGIFYRLLASNKLPFKDIQANVTEMLAGGVDTTSMTLQWHLYEIARNLRVQEMLR  | 352   |
| CP11A_CAPHI | -FRNYPGILYHLLKSEKMLLEDVKANITEMLAGGVDTTSMTLQWHLYEMARSLNVQEMLR  | 352   |
| CP11A_RABIT | LGGSYRGILYSLLTGSKLSFEDIKANVTEMLAGSVDTTSMTLQWHLYEMGAALGHQEMLR  | 347   |
| CP11A_DASAM | NEHAFPGVLTLLQALPFEDIRASIDVMSGADTTSTTVHMMYELAKHPHIQKNVR        | 354   |
| CP11A_ONCMY | THGKYPGVLASLLMLDKLSIEDIKASVTEMLAGGVDTTSTLLWTLYELARHPDLQEEELR  | 351   |
| CP11A_HUMAN | AEVLAARHQAGQDMATMLQVPLLKASIKETLRLHPISVTLQRYLVNDLVLRDYMIPAKT   | 413   |
| CP11A_RAT   | AEVLAARRQAQGDMAKMQVPLLKASIKETLRLHPISVTLQRYIVNDLVLRNYKIPAKT    | 410   |
| CP11A_MESAU | AEVLAARRQAQGDMAKMQVPLLKASIKETLRLHPISVTVQRYLVDDLVLRNYRIPAKM    | 409   |
| CP11A_MOUSE | AEVLAARRQAQGDMAKMQVPLLKASIKETLRLHPISVTLQRYTVNDLVLRNYKIPAKT    | 409   |
| CP11A_MACFA | AEVLAARRQAQGDMATILQVPLLKASIKETLRLHPISVTLQRYLVNDLVLRGYMIPAKT   | 413   |
| CP11A_BOVIN | EEVLNARRQAEGDISKMLQMVPLLKASIKETLRLHPISVTLQRYPESDLVLQDYLIPAKT  | 412   |
| CP11A_SHEEP | KEVLNARRQAEGDISKMLQMVPLLKASIKETLRLHPISVTLQRYPESDLVLQDYLIPAKT  | 412   |
| CP11A_PIG   | EEVLNARRQAQGDTSKMLQVPLLKASIKETLRLHPISVTLQRYLVNDLVLRDYMIPAKT   | 412   |
| CP11A_HORSE | EEVLAARRQAQGDSTMVQMVPLLKASIKETLRLHPISVTLQRYVNDLVLRDYMIPAKT    | 412   |
| CP11A_CAPHI | EEVLNARRQAEGDISKMLQMVPLLKASIKETLRLHPISVTLQRYPESDLVLQDYLIPAKT  | 412   |
| CP11A_RABIT | AEVLAARRQAQGDMTAMLSVPLLKASIKETLRLHPISVTLQRYLVNDLVLQDYMIPAKT   | 407   |
| CP11A_DASAM | SEIMEAHQKTEGDPVKMLKSVPLLKCVVKTLLRYPVAISIQRYLNETVQLQNYHIPAGT   | 414   |
| CP11A_ONCMY | AEVAVARQSTQGDMLQMLKMIPLVKGALKETLRLHPVAVSLQRYITEEIIVIQNYHIPCGT | 411   |
| CP11A_HUMAN | LVQVAIYALGREPTFFFDPENFDPTRWLSKDKNITYFRNLGFGWGVRCQCLGRRIAELEM  | 473   |
| CP11A_RAT   | LVQVASIAMGRESSFFPNPNKFDPTRWLEKSQNTTHFRYLGFGWGVRCQCLGRRIAELEM  | 470   |
| CP11A_MESAU | LVQVANYAMGREPSFFPNPNKFDPTRWLEKSQNTTHFRYLSFGWGVRCQCLGRRIAELEM  | 469   |
| CP11A_MOUSE | LVQVASFAMGRDPGFFPNPNKFDPTRWLEKSQNTTHFRYLGFGWGVRCQCLGRRIAELEM  | 469   |
| CP11A_MACFA | LVQVAIYALGREPTFFFDPENFDPTRWLSKDKNITYFRNLGFGWGVRCQCLGRRIAELEM  | 473   |
| CP11A_BOVIN | LVQVAIYAMGRDPAFFSSPDKFDPTRWLSKDKDLIHFRNLGFGWGVRCQCVGRRIAELEM  | 472   |
| CP11A_SHEEP | LVQVAIYAMGRDPAFFSNPDKFDPTRWLGKDKDLIHFRNLGFGWGVRCQCVGRRIAELEM  | 472   |
| CP11A_PIG   | LVQVAIYAMGRDPAFFSNPDKFDPTRWLGKDKDLIHFRNLGFGWGVRCQCVGRRIAELEM  | 472   |
| CP11A_HORSE | LVQVSIYTMGQDPTFFSNPRFDPTRWLDKDKDLIHFRNLGFGWGVRCQCLGRRIAELEM   | 472   |
| CP11A_CAPHI | LVQVAIYAMGRDPAFFSNPDKFDPTRWLGKDKDLIHFRNLGFGWGVRCQCVGRRIAELEM  | 472   |
| CP11A_RABIT | LVQVANYGMGREPSFFANPEKFDPPRWLDKDKNATHFR-----                   | 445   |
| CP11A_DASAM | LVQLGLYAMGRNPKIFKNPEQYNPERWLKGE--DTHFRHLGFGFGPRQCIGRRIAETQMV  | 472   |
| CP11A_ONCMY | LVQLGLYAMGRDPPVFRPEKYLPSRWLRTE--NQYFRSLGFGFGPRQCIGRRIAETEMQ   | 469   |
| CP11A_HUMAN | I FLINMLENFRVEIQHLSVDVGTTFNLILMPEKPI SFTFWPFNQEATQQ-----      | 521   |
| CP11A_RAT   | I FLINVLENFRIEVSQIRDVGTGTFNLILMPEKPI FNFQPLKQDLGSTMPRKGDTV-   | 526   |
| CP11A_MESAU | I FLINVLENFRIELQSLHDVGTGTFNLILMPEKPI FLNLQPLKDKLGTTTNR-----   | 520   |
| CP11A_MOUSE | I LLINLLENFRIEVOQLRDVGTGTFNLILMPEKPI LFNQPLKQDLGPAVTRKDNVTN   | 526   |
| CP11A_MACFA | I FLINMLENFRVEIQHLSVDVGTTFNLILMPEKPI SFTFWPFNQEATQE-----      | 521   |
| CP11A_BOVIN | LFLIHILENFKVEMQHIGDVNTIFNLILTPDKPI FLVFRPFNQDPPQA-----        | 520   |
| CP11A_SHEEP | LFLIHILENFRVEMQQIGDVNTIFNLILTPDKPI FLVFRPFNQDPPQA-----        | 520   |
| CP11A_PIG   | LFLIHILENFKVELQHFSDVNTIFNLILMPEKPI FLVFRPFNQDPLQA-----        | 520   |
| CP11A_HORSE | LFLIHILENFRVEIQHLDVSTFGLILIPKPI SFTFWPI TRAPPQA-----          | 520   |
| CP11A_CAPHI | LFLIHILENFKIEMQQIGDVNTIFNLILTPDKPI FLVFRPFNQDPPQA-----        | 520   |
| CP11A_RABIT | -----                                                         | ----- |
| CP11A_DASAM | LLMIHMLQNFKIETDPMTEVKSFKSLILIPDKPINLKFTPIK-----               | 514   |
| CP11A_ONCMY | LFLIHMLENFRVDKQRQVEVHSTFELILLPEKPI LLTLKPLKSGQ-----           | 514   |

The organisms are as follows:

|             |                                                                      |
|-------------|----------------------------------------------------------------------|
| CP11A_HUMAN | <i>Homo sapiens (Human)</i>                                          |
| CP11A_RAT   | <i>Rattus norvegicus (Rat)</i>                                       |
| CP11A_MESAU | <i>Mesocricetus auratus (Golden hamster)</i>                         |
| CP11A_MOUSE | <i>Mus musculus (Mouse)</i>                                          |
| CP11A_MACFA | <i>Macaca fascicularis (Crab-eating macaque) (Cynomolgus monkey)</i> |
| CP11A_BOVIN | <i>Bos taurus (Bovine)</i>                                           |
| CP11A_SHEEP | <i>Ovis aries (Sheep)</i>                                            |
| CP11A_PIG   | <i>Sus scrofa (Pig)</i>                                              |
| CP11A_HORSE | <i>Equus caballus (Horse)</i>                                        |
| CP11A_CAPHI | <i>Capra hircus (Goat)</i>                                           |
| CP11A_RABIT | <i>Oryctolagus cuniculus (Rabbit)</i>                                |
| CP11A_DASAM | <i>Dasyatis americana (Southern stingray)</i>                        |
| CP11A_ONCMY | <i>Oncorhynchus mykiss (Rainbow trout) (Salmo gairdneri)</i>         |

**Table S5. Linear Tyr/Trp Search Results, EC 3 Family, 5-Å ET cutoff distance, ≥1 solvent-exposed residue**

| Maximum Chain Length (residues) |                  | 0                                                    | 1   | 2    | 3   | 4   | 5   | 6  | 7  | 8  | 9 |
|---------------------------------|------------------|------------------------------------------------------|-----|------|-----|-----|-----|----|----|----|---|
| Data Set                        | Total Structures | Number of Structures with the Specified Chain Length |     |      |     |     |     |    |    |    |   |
| EC 3                            | 3999             | 18                                                   | 748 | 1495 | 976 | 440 | 183 | 80 | 36 | 15 | 8 |
| EC 3.1                          | 1225             | 4                                                    | 248 | 533  | 275 | 105 | 44  | 9  | 7  | 0  | 0 |
| EC 3.2                          | 863              | 1                                                    | 61  | 172  | 241 | 178 | 107 | 62 | 24 | 11 | 6 |
| EC 3.3                          | 27               | 0                                                    | 2   | 17   | 5   | 3   | 0   | 0  | 0  | 0  | 0 |
| EC 3.4                          | 1144             | 5                                                    | 180 | 462  | 327 | 116 | 35  | 9  | 4  | 4  | 2 |
| EC 3.5                          | 470              | 1                                                    | 121 | 201  | 105 | 33  | 7   | 1  | 1  | 0  | 0 |
| EC 3.6                          | 582              | 7                                                    | 168 | 268  | 106 | 29  | 4   | 0  | 0  | 0  | 0 |
| EC 3.7                          | 16               | 0                                                    | 3   | 6    | 6   | 0   | 1   | 0  | 0  | 0  | 0 |
| EC 3.8                          | 32               | 0                                                    | 5   | 18   | 8   | 0   | 1   | 0  | 0  | 0  | 0 |
| EC 3.9,10<br>11,13              | 8                | 0                                                    | 4   | 2    | 1   | 1   | 0   | 0  | 0  | 0  | 0 |

Definitions:

EC 3 Hydrolases

EC 3.1 Acting on ester bonds

EC 3.2 Glycosylases

EC 3.3 Acting on ether bonds

EC 3.4 Acting on peptide bonds (peptide hydrolases)

EC 3.5 Acting on carbon-nitrogen bonds, other than peptide bonds

EC 3.6 Acting on acid anhydrides

EC 3.7 Acting on carbon-carbon bonds

EC 3.8 Acting on halide bonds

EC 3.9 Acting on phosphorus-nitrogen bonds

EC 3.10 Acting on sulfur-nitrogen bonds

EC 3.11 Acting on carbon-phosphorus bonds

EC 3.12 Acting on sulfur-sulfur bonds

EC 3.13 Acting on carbon-sulfur bonds



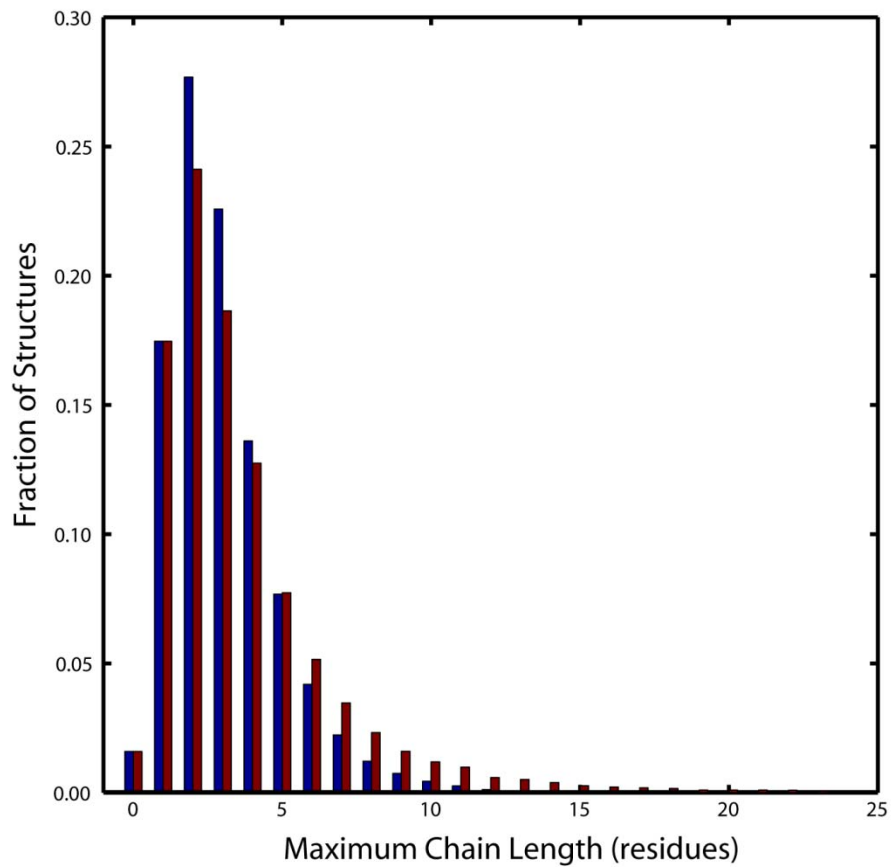

**Fig. S1.** Distributions of maximum linear (blue) and branched (red) redox chain lengths (7.5-Å ET cutoff, at least one solvent-exposed residue) found in 27,355 unique protein x-ray crystal structures in the RCSB Protein Data Bank (mean linear chain (MLC) 3.02 residues, 54% of structures with maximum linear chain length  $\geq 3$  residues; mean branched chain (MBC) 3.71 residues, 57% of structures with maximum branched chain length  $\geq 3$  residues).

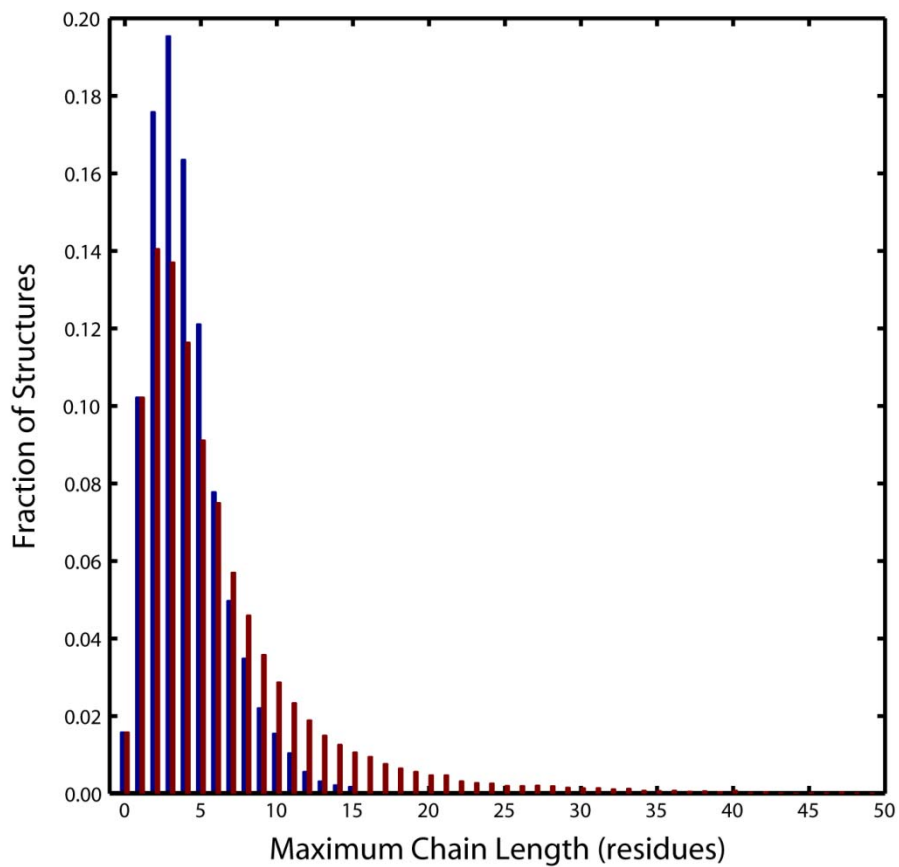

**Fig. S2.** Distributions of maximum linear (blue) and branched (red) redox chain lengths (10-Å ET cutoff, at least one solvent-exposed residue) found in 27,355 unique protein x-ray crystal structures in the RCSB Protein Data Bank (MLC 4.07 residues, 71% of structures with maximum linear chain length  $\geq 3$  residues; MBC 6.30 residues, 74% of structures with maximum branched chain length  $\geq 3$  residues).

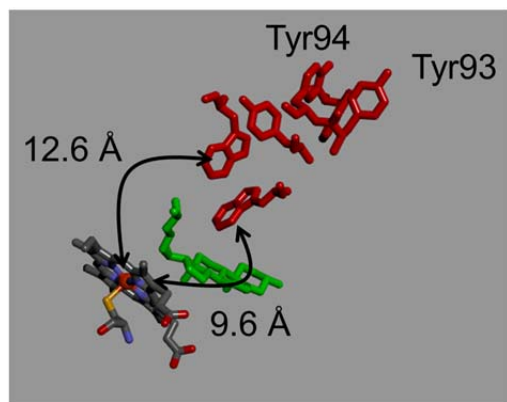

(CYP11A1, PDB #3N9Y)

**Fig. S3.** Active site and Tyr/Trp chain residues in CYP11A1.

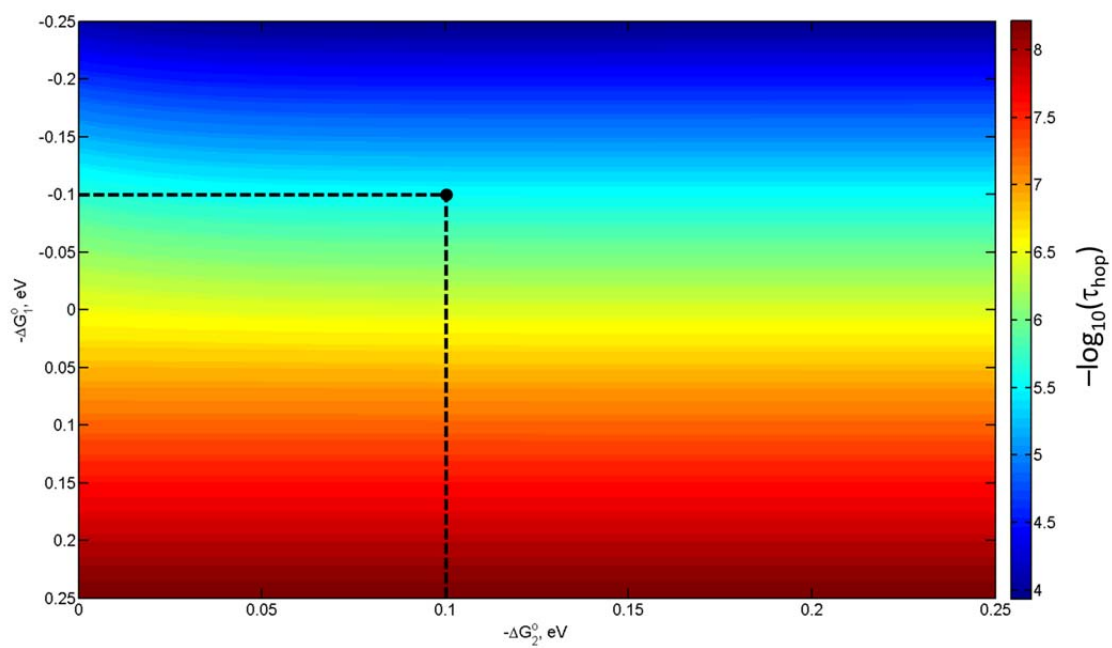

**Fig. S4.** Electron hopping map for Tyr/Trp chain in CYP11A1. Color indicates survival time ( $\tau_{\text{hop}}$ , seconds) of a hole at the origin residue. Intersection of the dashed lines indicates location of estimated survival time point ( $\sim 3 \mu\text{s}$ ).

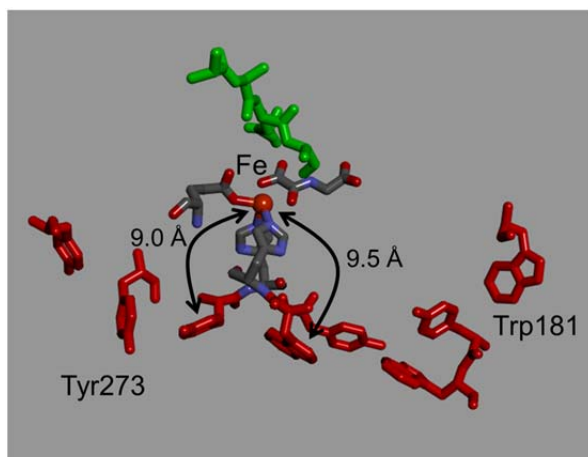

KDM4A, PDB ID 4V2W

**Fig. S5.** Active site and Tyr/Trp chain residues in KDM4A.

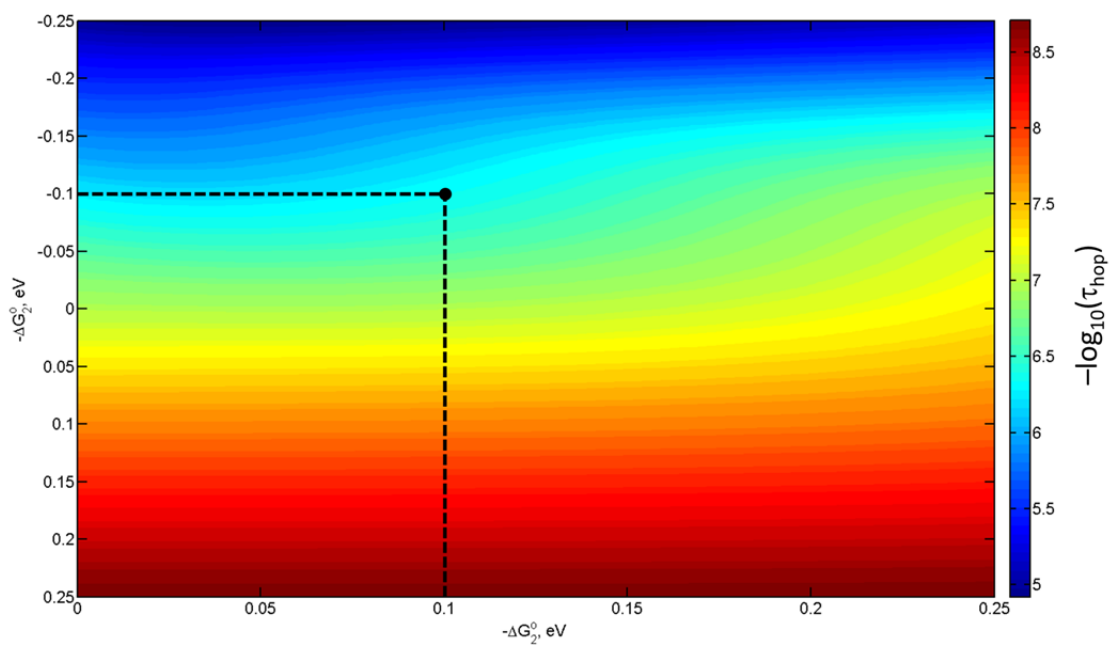

**Fig. S6.** Electron hopping map for Tyr/Trp chain in human KDM4A. Color indicates survival time ( $\tau_{\text{hop}}$ , seconds) of a hole at the origin residue. Intersection of the dashed lines indicates location of estimated survival time point ( $\sim 0.4 \mu\text{s}$ ).

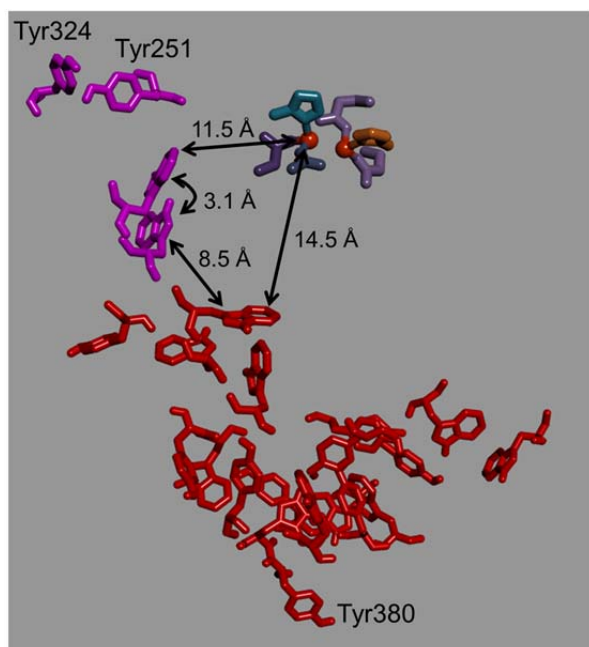

**Methane Monooxygenase**  
***Methylococcus capsulatus* (Bath)**  
**(PDB ID: 1MTY)**

**Fig. S7.** Active site and Tyr/Trp chain residues in methane monooxygenase *Methylococcus capsulatus* (Bath).

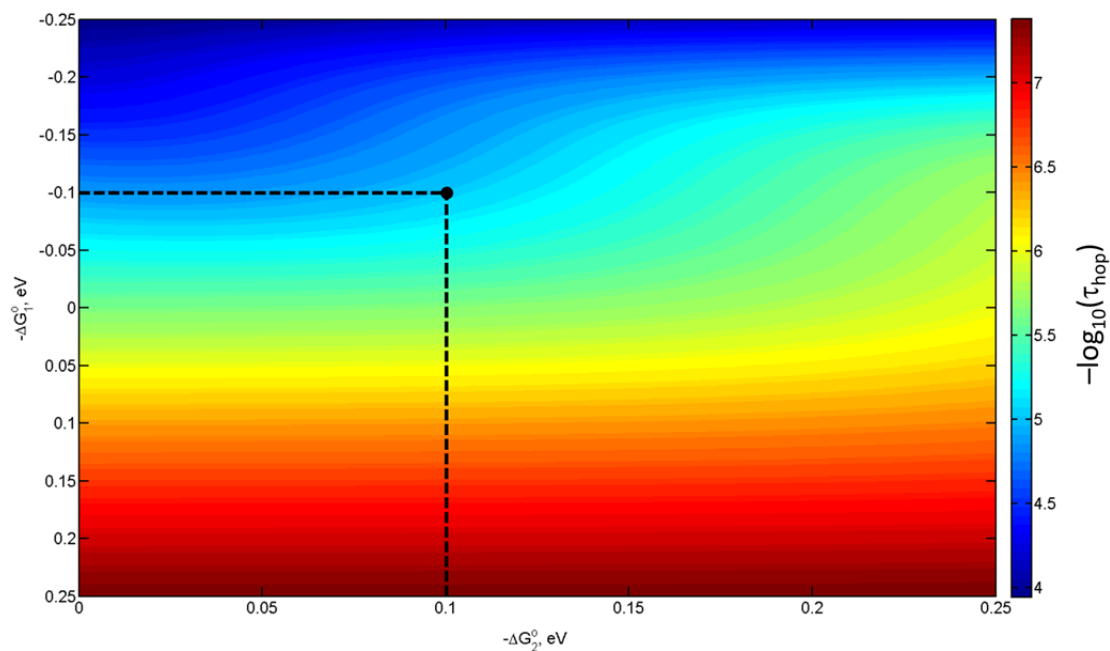

**Fig. S8.** Electron hopping map for Tyr/Trp chain in methane monooxygenase *Methylococcus capsulatus* (Bath). Color indicates survival time ( $\tau_{\text{hop}}$ , seconds) of a hole at the origin residue. Intersection of the dashed lines indicates location of estimated survival time point ( $\sim 9 \mu\text{s}$ ).
